# Supplementary material for: Heteroatom zeolites with a high content of framework metal sites as Lewis-acid catalysts for the conversion of ethanol–acetaldehyde to 1,3-butadiene
Source: Royal Society of Chemistry journal article supplement (doi:10.1039/d2cy01841a), 2022-11-17
Supplement: d2cy01841a1.pdf [file d2cy01841a1.pdf]

1

## SUPPORTING INFORMATION

2

**High framework metal sites in heteroatom zeolite as Lewis acid**

3

**catalyst for the conversion of ethanol-acetaldehyde to 1,3-butadiene**

4

5

6

Haoxi Jiang,<sup>abc</sup> Liping Yi,<sup>abc</sup> Guochao Yang,<sup>abc</sup> and Lingtao Wang<sup>\*abc</sup>

7

8

9

10

11

12

13

14

15

16

17

18

19

20

21

22

23

24 Corresponding Address:

25 *<sup>a</sup> Key Laboratory for Green Chemical Technology of Ministry of Education, R&D*

26 *Center for Petrochemical Technology, Tianjin University, Tianjin 300072, China*

27 *<sup>b</sup> Zhejiang Institute of Tianjin University, Ningbo, Zhejiang, 315201, China*

28 *<sup>c</sup> State Key Laboratory of Engines, Tianjin University, Tianjin 300072, China*

29 *E-mail: ltwang@tju.edu.cn*

30 *Tel: +86-22-27406119*

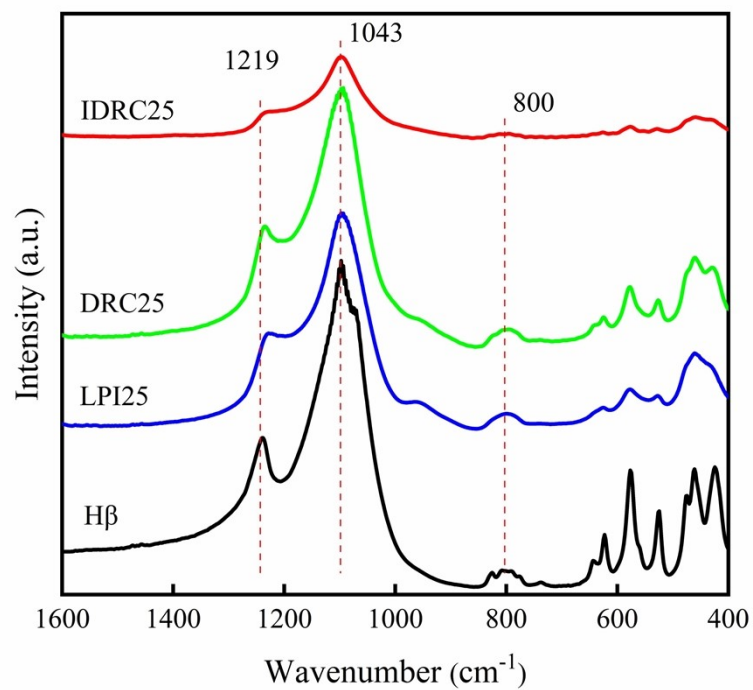

31 **Supplemental Data and Figures**

32 Fig. S1. FI-IR spectra of IDRC25, DRC25 and LPI25. The peaks at 1219, 1043 and 800  $\text{cm}^{-1}$  of are  
 33 attributed to Si-O-Si bond in zeolite framework.

34

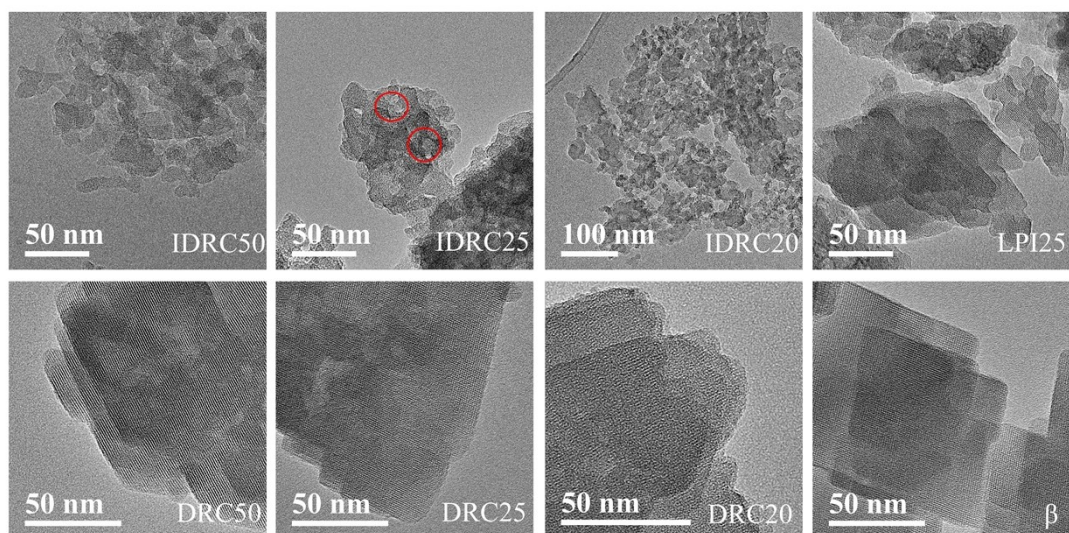

35 Fig. S2. TEM images of LPI25, samples prepared by IDRC and DRC with different Zr contents.

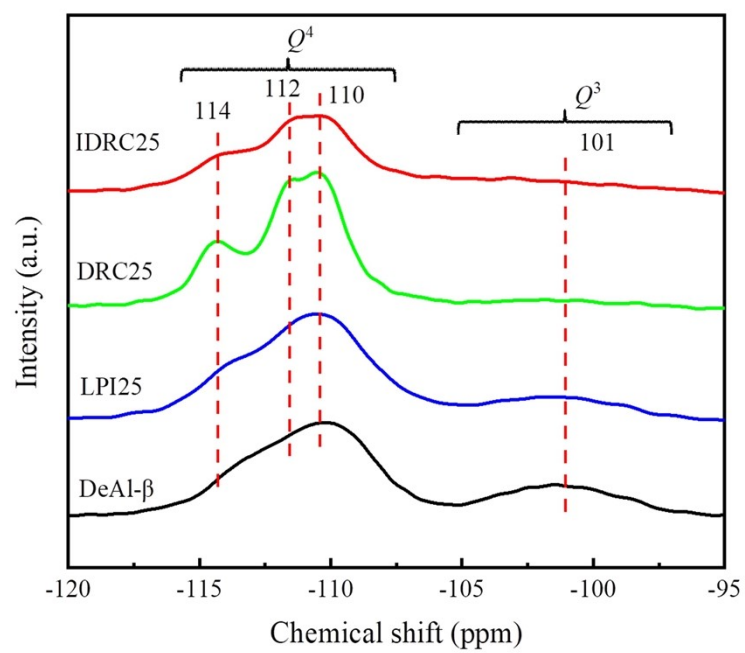

36 Fig. S3.  $^{29}\text{Si}$  MAS NMR spectra of IDRC25, DRC25 and LPI25. The peak at -101 ppm is assigned  
 37 to  $Q^3$  species of  $(\text{SiO})_3\text{SiOH}$ , and the peaks at -114, -112 and -110 ppm are assigned to  $Q^4$  species  
 38 of  $\text{Si}(\text{OSi})_4$  at different T sites.

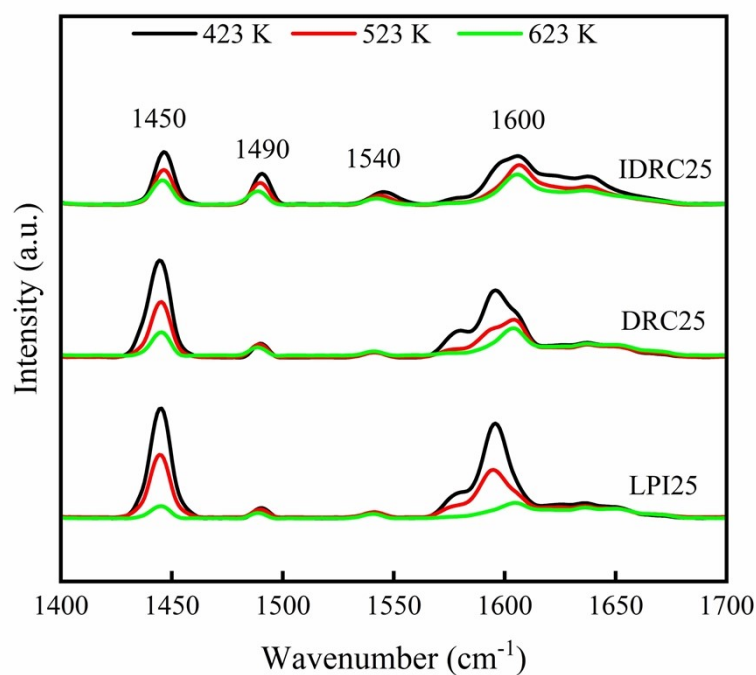

39 Fig. S4. Py-IR spectra of IDRC25, DRC25 and LPI25. The bands at 1600 and 1450  $\text{cm}^{-1}$  are assigned  
 40 to Lewis acid sites. The band at 1540  $\text{cm}^{-1}$  is assigned to Brønsted acid sites. The band at 1490  $\text{cm}^{-1}$   
 41 represents Brønsted+Lewis sites. The acid strength (weak, medium and strong) was determined  
 42 by treating at 423, 523 and 623 K.

43

44 Table S1. The acidity of samples IDRC25, DRC25 and LPI25 by  $\text{NH}_3$ -TPD

| Sample | Acidity ( $\mu\text{mol g}^{-1}$ ) |      |        | Temperature at maximum (K) |        |
|--------|------------------------------------|------|--------|----------------------------|--------|
|        | total                              | weak | strong | peak 1                     | peak 2 |
| IDRC25 | 978                                | 241  | 737    | 441                        | 537    |
| DRC25  | 527                                | 103  | 424    | 437                        | 530    |
| LPI25  | 246                                | 71   | 174    | 429                        | 510    |

45

46

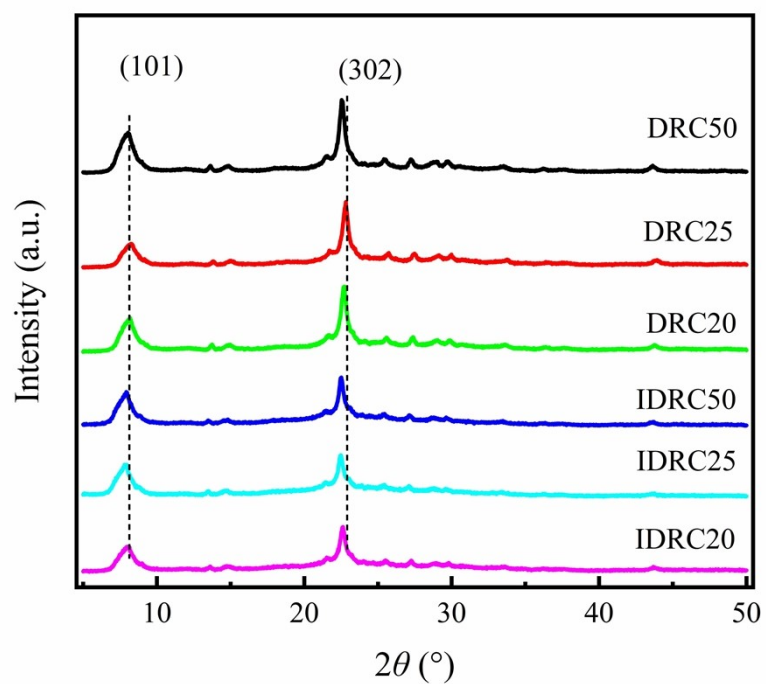

47 Fig. S5. XRD patterns of IDRC and DRC samples with different Zr contents. The diffraction peaks  
48 at  $2\theta = \sim 8.0^\circ$  and  $22.4^\circ$  represents (101) and (302) crystal planes of  $\beta$  zeolite, respectively.  $\text{ZrO}_2$   
49 diffraction peaks at  $2\theta = \sim 28.5^\circ$  and  $31.8^\circ$  were not detected in all prepared samples.

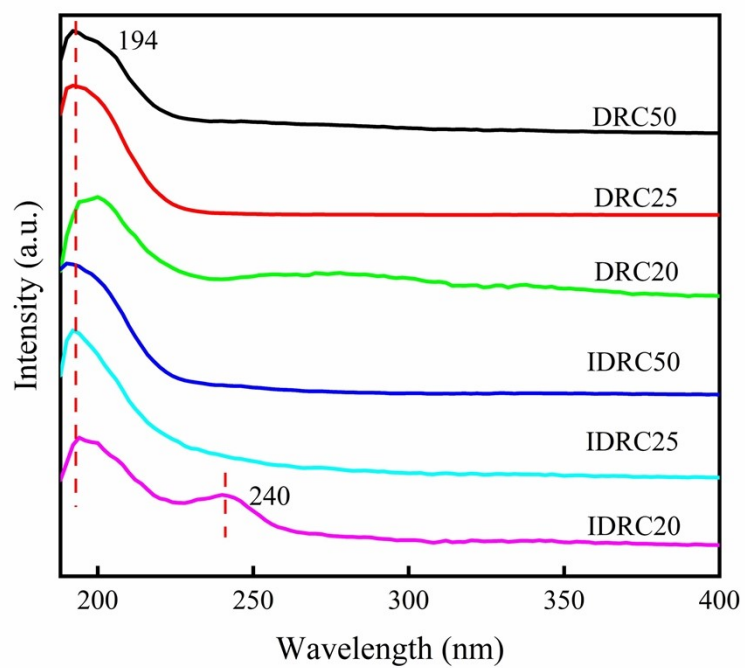

50 Fig. S6. UV-Vis spectra of IDRC and DRC samples with different Zr contents. The absorption peak  
51 at 190-200 nm generally assigns to the tetrahedral Zr in the framework. And the absorption peak at  
52 230-240 nm is related to the extra-framework  $ZrO_2$ -like species.

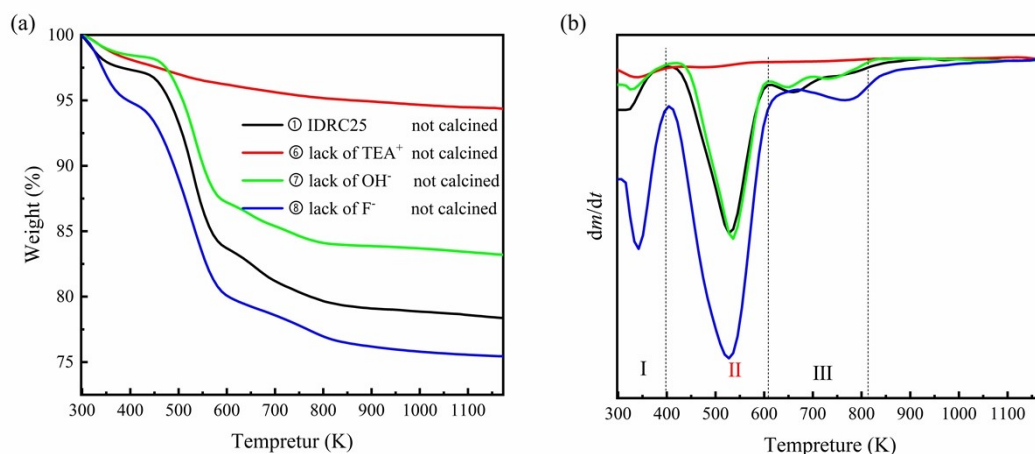

53 Fig. S7. (a) TG and (b) DTG of comparative experiments. The black line was comparative sample  
 54 ① IDRC25, red line was sample ⑥ lack of TEA<sup>+</sup>, green line was sample ⑦ lack of OH<sup>-</sup>, blue line  
 55 was sample ⑧ lack of F<sup>-</sup>. All samples were not calcined. The weight loss in region I (298-423 K)  
 56 represents the desorption of water in the sample. The region II (423-623 K) represents the Hoffmann  
 57 elimination of template TEA<sup>+</sup>. And the region III (> 623 K) was attributed to the further degradation  
 58 and oxidation of the template.

59

60 Table S2. The textural properties of IDRC and DRC samples with different Zr contents.

| Sample | R.C.<br>(%) | $V_{\text{Meso}}$<br>( $\text{cm}^3 \text{g}^{-1}$ ) | Zr content (wt%) |                      | Si/Zr <sup>a</sup> | Con. <sup>b</sup><br>(%) | Sel. <sup>b</sup><br>(%) |
|--------|-------------|------------------------------------------------------|------------------|----------------------|--------------------|--------------------------|--------------------------|
|        |             |                                                      | gel              | Product <sup>a</sup> |                    |                          |                          |
| IDRC50 | 58          | 0.618                                                | 2.9              | 3.1                  | 46                 | 48.7                     | 58.6                     |
| IDRC25 | 53          | 0.582                                                | 5.6              | 5.0                  | 28                 | 55.9                     | 66.0                     |
| IDRC20 | 61          | 0.451                                                | 6.9              | 5.3                  | 26                 | 48.7                     | 58.6                     |
| DRC100 | 114         | 0.282                                                | 1.5              | n.m. <sup>c</sup>    | n.m. <sup>c</sup>  | 32.9                     | 63.7                     |
| DRC75  | 114         | 0.282                                                | 2.0              | n.m. <sup>c</sup>    | n.m. <sup>c</sup>  | 39.8                     | 64.8                     |
| DRC50  | 102         | 0.279                                                | 2.9              | 1.35                 | 110                | 40.7                     | 65.5                     |
| DRC25  | 87          | 0.285                                                | 5.6              | 2.2                  | 66                 | 45.1                     | 69.4                     |
| DRC20  | 94          | 0.291                                                | 6.9              | 3.4                  | 43                 | 45.4                     | 66.9                     |
| DRC15  | 80          | 0.313                                                | 8.9              | n.m. <sup>c</sup>    | n.m. <sup>c</sup>  | 43.0                     | 62.7                     |

61 <sup>a</sup> Determined by ICP. <sup>b</sup> Conversion and selectivity. Reaction conditions: 598 K, WHSV = 1.0  
 62 h<sup>-1</sup>, TOS = 6 h. <sup>c</sup> Not measured.

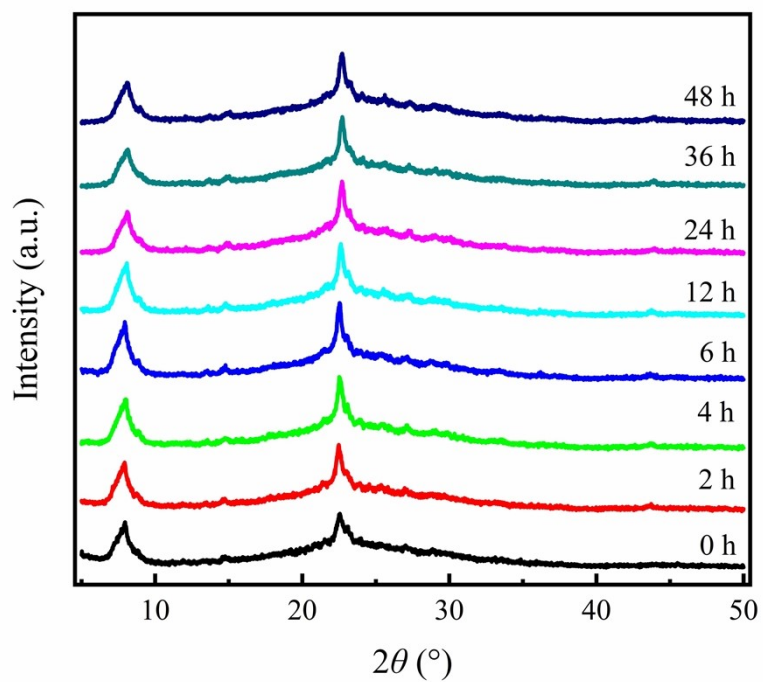

63

Fig. S8. XRD patterns of IDRC25 crystallized for different time.

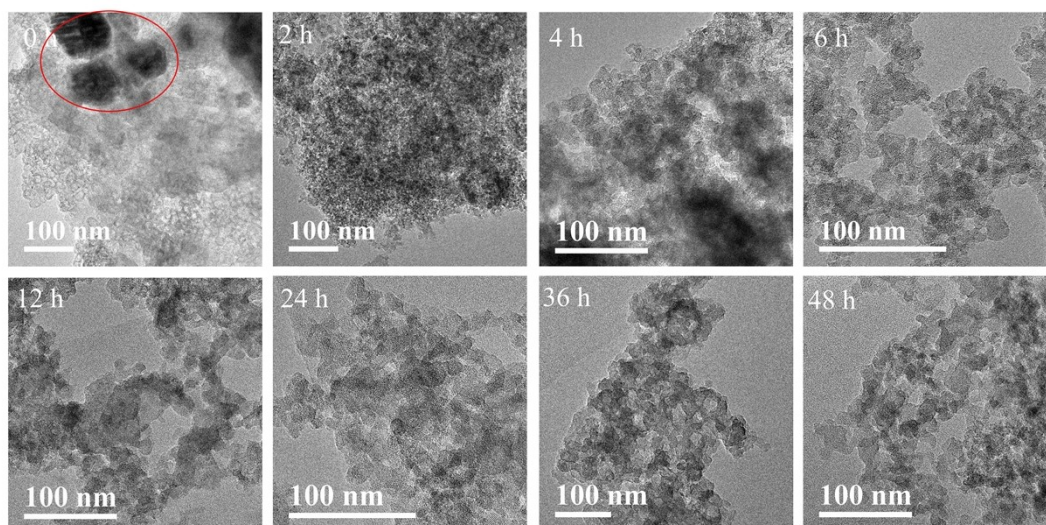

64

Fig. S9. TEM images of IDRC25 crystallized for different time. The black particles in the red

65

circle are Zr agglomerations in gel.



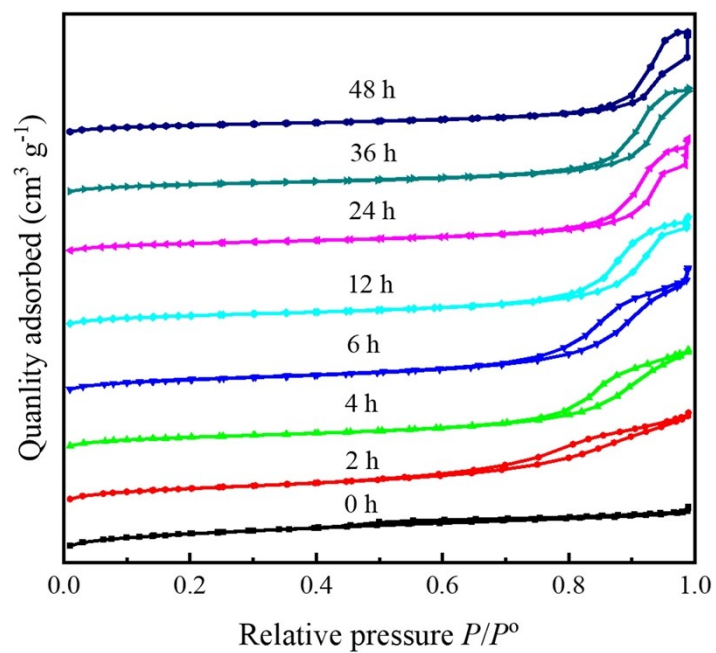

66 Fig. S10. N<sub>2</sub> adsorption-desorption curves of IDRC25 crystallized for different time.

67

68

Table S3. Carbon deposition of IDRC25.

| TOS (h) | Carbon deposition (%) |
|---------|-----------------------|
| 6       | 13.1                  |
| 100     | 25.8                  |

69
